# Supplementary material
Source: Elsevier journal article supplement (https://discovery.ucl.ac.uk/id/eprint/1433395/3/mmc2.pdf)

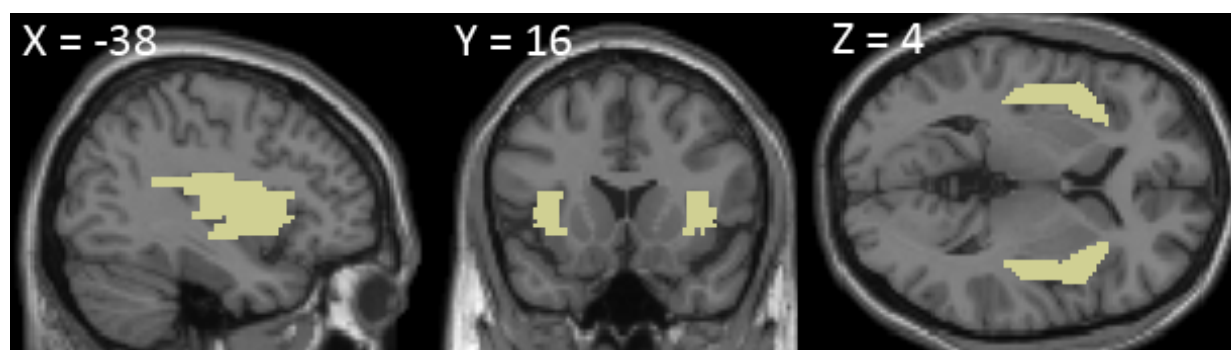

Supplement: mmc2 [file mmc2.pdf]
